# Supplementary material
Source: publisher site journal article supplement (https://www.spandidos-publications.com/8177/downloadSupplementary)
Supplement: Supplementary file 1 [file downloadSupplementary]

Table SI. mRNA targets of hsa-miR-200c-3p which are the 20 mRNAs having the highest target score using the miR target prediction and functional annotation database (miRDB).

| Target Rank | Target score | Gene symbol | Gene                                                        |
|-------------|--------------|-------------|-------------------------------------------------------------|
| 1           | 100          | VASH2       | Vasohibin 2                                                 |
| 2           | 100          | HIPK3       | Homeodomain interacting protein kinase 3                    |
| 3           | 100          | MAP2        | Microtubule associated protein 2                            |
| 4           | 100          | ERRFI1      | ERBB receptor feedback inhibitor 1                          |
| 5           | 100          | ZEB1        | Zinc finger E-box binding homeobox 1                        |
| 6           | 100          | NR5A2       | Nuclear receptor subfamily 5 group A member 2               |
| 7           | 100          | ZEB2        | Zinc finger E-box binding homeobox 2                        |
| 8           | 99           | RECK        | Reversion including cysteine rich protein with kazal motifs |
| 9           | 99           | SLIT2       | Slit guidance ligand 2                                      |
| 10          | 99           | WIPF1       | WAS/WASL interacting protein family member 1                |
| 11          | 99           | C11orf95    | Chromosome 11 open reading frame 95                         |
| 12          | 99           | FAM8A1      | Family with sequence similarity 8 member A1                 |
| 13          | 99           | LHFPL6      | LHFPL tetraspan subfamily member 6                          |
| 14          | 99           | AP1S2       | Adaptor related protein complex 1 subunit sigma 2           |
| 15          | 99           | SEC23A      | Sec23 homolog A, coat complex II component                  |
| 16          | 99           | TBX18       | T-box 18                                                    |
| 17          | 99           | PTPN21      | Protein tyrosine phosphatase, non-receptor type 21          |
| 18          | 99           | DNAJC3      | DnaJ heat shock protein family (Hsp40) member C3            |
| 19          | 99           | QKI         | QKI, KH domain containing RNA binding                       |
| 20          | 99           | RIC1        | RIC1 homolog, RAB6A GEF complex partner 1                   |

miR, microRNA.
